# Supplementary material for: The critical effect of polarization on the dynamical structure of guanine quadruplex DNA
Source: Royal Society of Chemistry journal article supplement (doi:10.1039/c2cp44100d), 2013-01-01
Supplement: c2cp44100d.pdf [file c2cp44100d.pdf]

## Supporting Information

Jianing Song,<sup>†</sup> Changge Ji,<sup>\*,†,‡</sup> and John Z.H. Zhang<sup>\*,†,‡,¶</sup>

*State Key Laboratory of Precision Spectroscopy, East China Normal University, Shanghai 200062  
China, Institute of Theoretical and Computational Science, East China Normal University,  
Shanghai 200062 China, and Department of Chemistry, New York University, New York, New  
York 10003 USA*

E-mail: [chicago.ji@gmail.com](mailto:chicago.ji@gmail.com); [john.zhang@nyu.edu](mailto:john.zhang@nyu.edu)

---

\*To whom correspondence should be addressed

<sup>†</sup>State Key Laboratory of Precision Spectroscopy, East China Normal University, Shanghai 200062 China

<sup>‡</sup>Institute of Theoretical and Computational Science, East China Normal University, Shanghai 200062 China

<sup>¶</sup>Department of Chemistry, New York University, New York, New York 10003 USA

## Figure captions

- Fig. S1. (a) The total PNC and AMBER charges of individual nucleotide of G-DNA (left). the Amber result is given by the black line and red line stands for the result of PNC. (b) Some calculated PNC atomic charges of G-DNA (right).
- Fig. S2. (a) The fluctuations of the backbone angle( $\alpha$ ) as a function of time. Red line is for PNC charge, black for AMBER and yellow for XRD. (b) The fluctuations of the backbone angle( $\gamma$ ) as a function of time. Red line is for PNC charge, black for AMBER and yellow for XRD.
- Fig. S3. (a) the structure of loop (T5-T6-T7-T8) under PNC charges aligned with the XRD structure, green color for XRD and pink for PNC. (b) the structure of loop (T17-T18-T19-T20) under PNC charges aligned with the XRD structure, green color for XRD and pink for PNC. (c) the structure of loop (T5-T6-T7-T8) under AMBER charges aligned with the XRD structure, green color for XRD and purple for PNC. (d) the structure of loop (T17-T18-T19-T20) under AMBER charges aligned with the XRD structure, green color for XRD and purple for PNC.
- Fig. S3. (a) The fluctuations of the backbone angle( $\alpha$ ) as a function of time. Red line is for PNC charge, black for AMBER and yellow for XRD. (b) The fluctuations of the backbone angle( $\gamma$ ) as a function of time. Red line is for PNC charge, black for AMBER and yellow for XRD.
- Fig. S4. (a) Binding pattern for the stem-loop junction ion K26. Black dash lines indicate the distance of O4'@T8-K26 and O2'@T7-K26. (b) Binding pattern for the stem-loop junction ion K27. Black dash lines indicate the distance of O4'@T20-K27 and O2'@T19-K27.
- Fig. S5. (a) Distance of K26 and the oxygen atoms in T8 and T7. Black line indicates the distance of O4'@T8-K26, with red for O2'@T7-K26. (b) Distance of K27 and the oxygen atoms in T20 and T19. Black line indicates the distance of O4'@T20-K27, with red for O2'@T19-K27.
- Fig. S6. (a) Projected force along the direction of the channel (vector  $V_c$ ) on stem-loop junction ion K27 as a function of simulation time. Red lines stands for the changes under PNC. Black line

is the changes under AMBER charges. Green color describes the average force of AMBER charges, while blue one for PNC. (b) The same as in (a) but for K26. (c)  $F_{27}$  and  $F_{26}$  is, respectively, the total force on K27 and K26. The vector  $V_c$  denotes the direction of the channel.

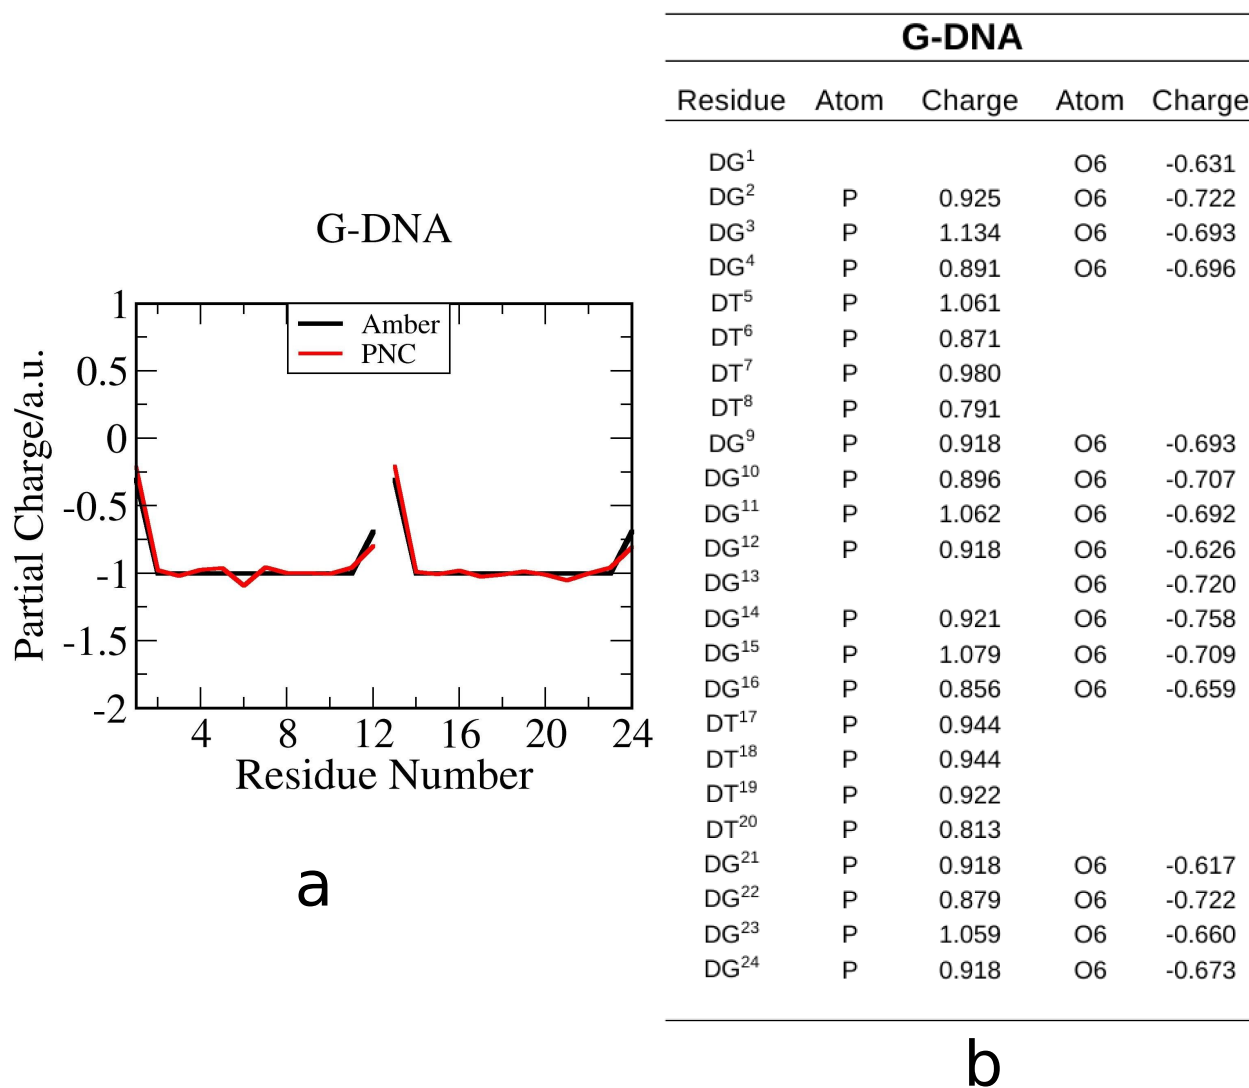

Figure S1

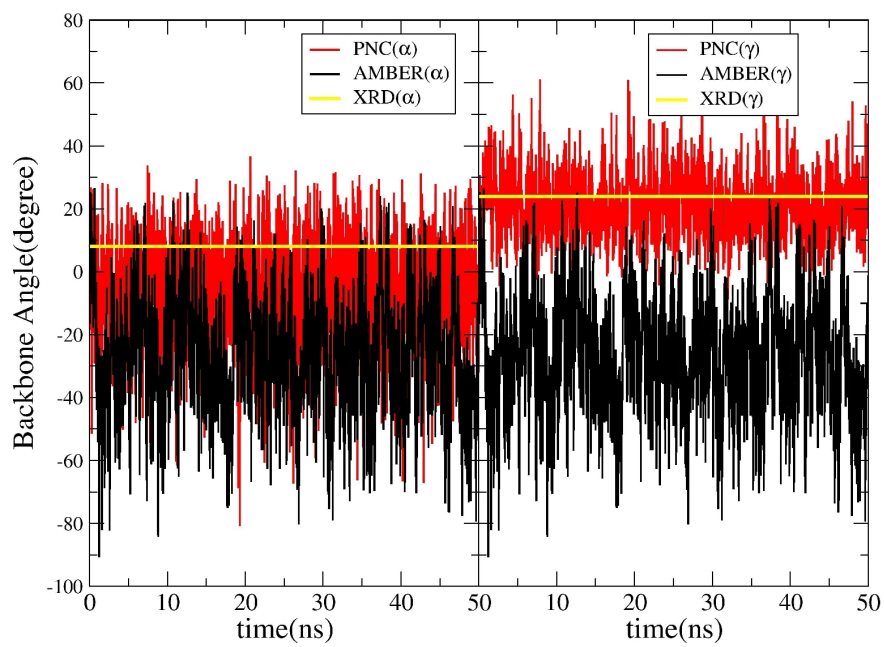

Figure S2

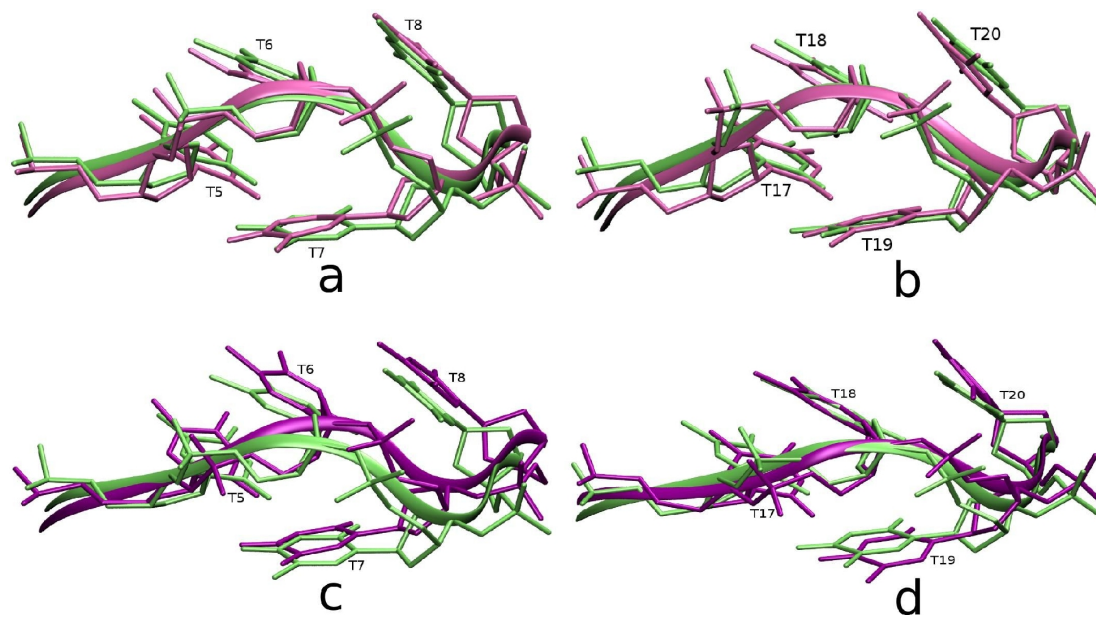

Figure S3

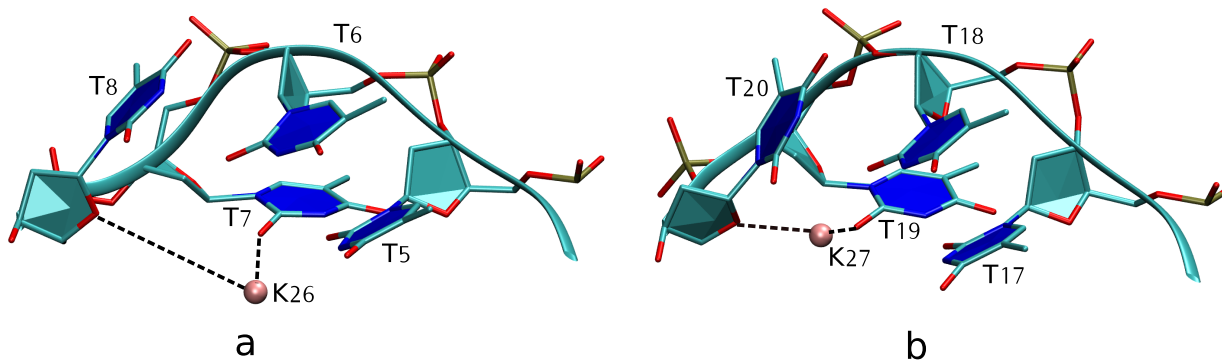

Figure S4

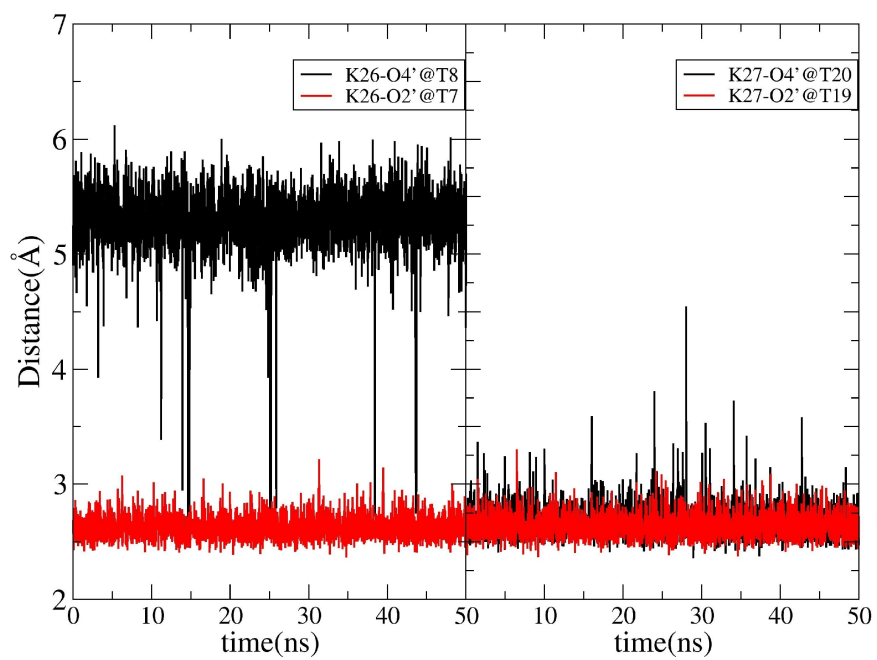

Figure S5

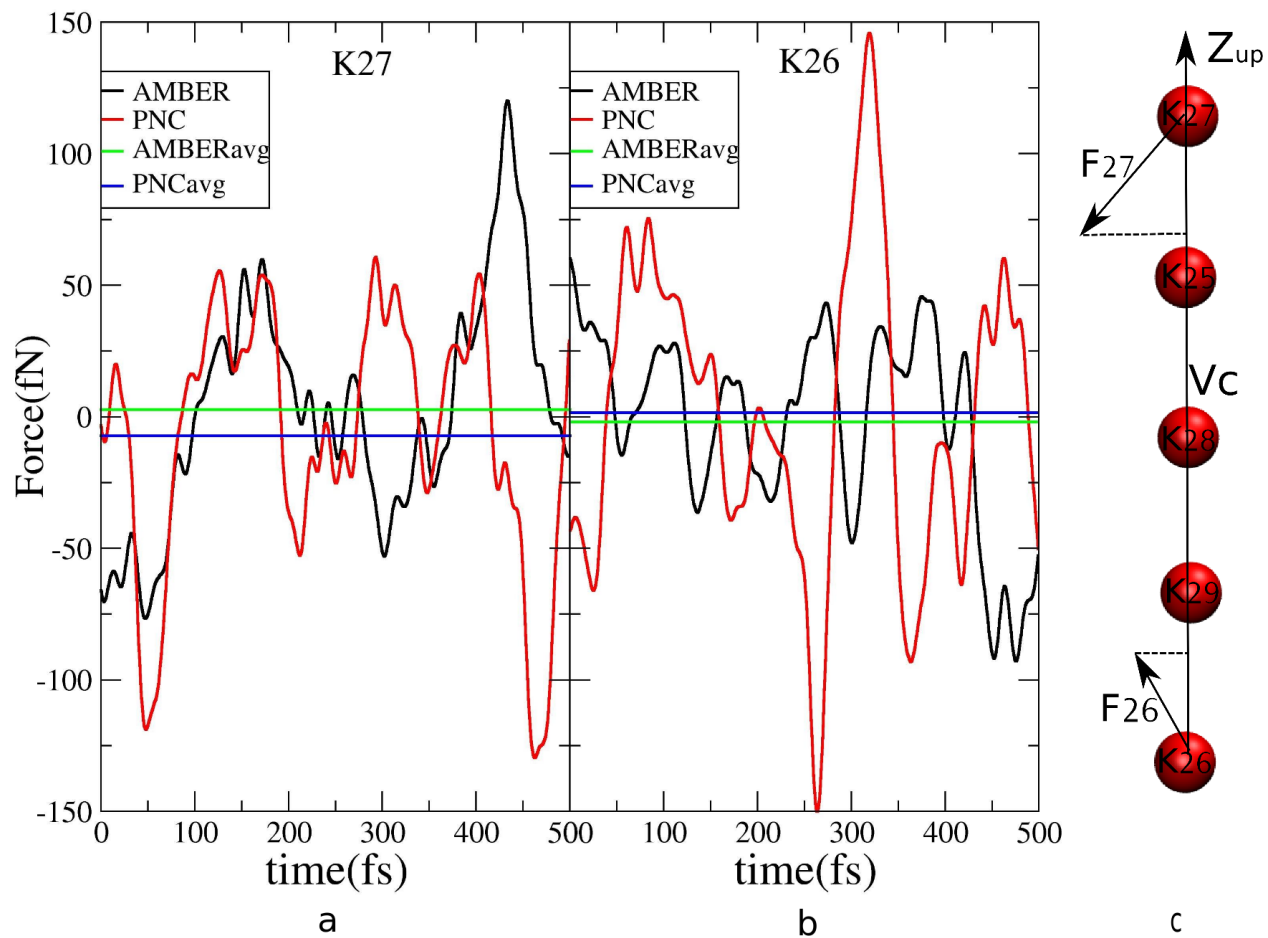

Figure S6
